# Supplementary material for: Adult Hepatitis B Virus Vaccination Coverage in China from 2011 to 2021: A Systematic Review
Source: MDPI journal article supplement (doi:10.3390/vaccines10060900), 2022-06-06
Supplement: s1 [file s1]

## Supplementary materials

Table S1. Detailed search strategies for PubMed.

Table S2. The AHRQ forms and modified version.

Table S3. Quality assessment of eligible studies

**Table S1.** Detailed search strategies for PubMed

| #  | Searches                                                                                                                                         |
|----|--------------------------------------------------------------------------------------------------------------------------------------------------|
| 1  | Hepatitis B [MeSH]                                                                                                                               |
| 2  | hepatitis B[Title/Abstract]                                                                                                                      |
| 3  | #1 OR #2                                                                                                                                         |
| 4  | Vaccines [MeSH]                                                                                                                                  |
| 5  | Vaccination [MeSH]                                                                                                                               |
| 6  | vaccin*[Title/Abstract] OR immuni*[ Title/Abstract]                                                                                              |
| 7  | #4 OR #5 OR #6                                                                                                                                   |
| 8  | "Humans"[MeSH]                                                                                                                                   |
| 9  | coverage [Title/Abstract] OR uptake [Title/Abstract] OR prevalence<br>[Title/Abstract] OR proportion [Title/Abstract] OR status [Title/Abstract] |
| 10 | China [MeSH]                                                                                                                                     |
| 11 | China [Title/Abstract] Or Chinese [Title/Abstract]                                                                                               |
| 12 | #10 OR #11                                                                                                                                       |
| 13 | 2011/01/01:2021/10/01[Date - Publication]                                                                                                        |
| 14 | #3 AND #7 AND #8 AND #9 AND #12 AND #13                                                                                                          |

**Table S2.** The AHRQ forms and modified version.

| Number | AHRQ Item                                                                                                                       | Modified AHRQ Item                                                                                     |
|--------|---------------------------------------------------------------------------------------------------------------------------------|--------------------------------------------------------------------------------------------------------|
| Q1     | Define the source of information (survey, record review)                                                                        | Is the study defined the source of information (survey, record review)?                                |
| Q2     | List inclusion and exclusion criteria for exposed and unexposed subjects (cases and controls) or refer to previous publications | Is the included population representative of the target population?                                    |
| Q3     | Indicate time period used for identifying patients                                                                              | Is the included population representative of the national population?                                  |
| Q4     | Indicate whether or not subjects were consecutive if not population-based                                                       | Is the study list the inclusion and exclusion criteria for subjects or refer to previous publications? |
| Q5     | Indicate if evaluators of subjective components of the study were masked to other aspects of the status of the participants     | Is the method of data collection properly described?                                                   |
| Q6     | Describe any assessments undertaken for quality assurance purposes (e.g., test/retest of primary outcome measurements)          | Is the study indicated the time period used for identifying subjects?                                  |
| Q7     | Explain any patient exclusions from the analysis                                                                                | Is the study described how missing data were handled?                                                  |
| Q8     | Describe how confounding was assessed and/or controlled.                                                                        | Is there a clear definition of hepatitis B vaccination status?                                         |
| Q9     | If applicable, explain how missing data were handled in the analysis                                                            | Is the study described any assessments undertaken for quality assurance purposes?                      |
| Q10    | Summarize patient response rates and completeness of data collection                                                            | Summarize subjects' response rates and completeness of data collection                                 |
| Q11    | Clarify what follow-up, if any, was expected and the percentage of patients for which incomplete data or follow-up was obtained |                                                                                                        |

**Table S3.** Quality assessment of eligible studies.

| Author, Year   | Q1 | Q2 | Q3 | Q4 | Q5 | Q6 | Q7 | Q8 | Q9 | Q10 | Score |
|----------------|----|----|----|----|----|----|----|----|----|-----|-------|
| Wang SQ, 2011  | Y  | N  | N  | Y  | N  | Y  | N  | N  | N  | Y   | 4     |
| Zhang XS, 2011 | Y  | Y  | N  | Y  | Y  | N  | N  | N  | N  | N   | 4     |
| Zhang W, 2011  | Y  | Y  | N  | Y  | Y  | N  | N  | Y  | N  | Y   | 6     |
| Chen YX, 2012  | Y  | N  | N  | Y  | Y  | Y  | N  | N  | N  | N   | 4     |
| OuYang L, 2013 | Y  | Y  | N  | Y  | N  | Y  | N  | N  | N  | Y   | 5     |
| Chen XQ, 2015  | Y  | Y  | N  | Y  | Y  | Y  | N  | N  | N  | Y   | 6     |
| Yan H, 2015    | Y  | Y  | N  | Y  | Y  | Y  | N  | N  | N  | Y   | 6     |
| Li ze, 2015    | Y  | N  | N  | N  | N  | N  | N  | N  | N  | N   | 1     |
| Su YP, 2016    | Y  | Y  | N  | Y  | Y  | N  | N  | N  | Y  | N   | 5     |
| Gao P, 2016    | Y  | Y  | N  | Y  | Y  | Y  | N  | N  | N  | N   | 5     |
| Liu TT, 2017   | Y  | Y  | N  | Y  | Y  | Y  | N  | N  | Y  | N   | 6     |
| Liang ZS, 2017 | Y  | N  | N  | N  | Y  | Y  | N  | N  | N  | Y   | 4     |
| Ye X, 2017     | Y  | Y  | N  | Y  | Y  | Y  | N  | N  | N  | Y   | 6     |
| Mai W, 2018    | Y  | Y  | N  | Y  | N  | Y  | N  | N  | N  | Y   | 5     |
| Ma TL, 2019    | Y  | Y  | N  | Y  | Y  | N  | N  | N  | Y  | N   | 5     |
| Yang K, 2019   | Y  | Y  | N  | Y  | Y  | Y  | N  | N  | N  | Y   | 6     |
| Shi W, 2020    | Y  | Y  | N  | Y  | Y  | Y  | N  | N  | N  | N   | 5     |
| Wan YM, 2020   | Y  | Y  | N  | Y  | Y  | N  | N  | Y  | N  | Y   | 6     |
| Xu C, 2020     | Y  | Y  | N  | Y  | Y  | N  | N  | Y  | N  | Y   | 6     |
| Xu Y, 2020     | Y  | Y  | N  | Y  | Y  | Y  | N  | N  | N  | Y   | 6     |
| Yan L, 2021    | Y  | Y  | N  | Y  | Y  | Y  | N  | Y  | N  | N   | 6     |

Y: Yes; N: No; UC: Unclear.
